# Supplementary material for: A highly selective fluorescent chemosensor for Fe3+ based on a new diarylethene with a rhodamine 6G unit
Source: Royal Society of Chemistry journal article supplement (doi:10.1039/c7ra04728b), 2017-01-01
Supplement: c7ra04728b1.pdf [file c7ra04728b1.pdf]

## *Supporting information*

### **A highly selective fluorescent chemosensor for Fe<sup>3+</sup> based on a new diarylethene with rhodamine 6G**

Huitao Xu, Haichang Ding, Gang Li, Congbin Fan, Gang Liu\*, Shouzhi Pu\*

*Jiangxi Key Laboratory of Organic Chemistry, Jiangxi Science & Technology Normal University,*

*Nanchang 330013, PR China*

**\*Corresponding author:** E-mail address: [liugang0926@163.com](mailto:liugang0926@163.com) (G. Liu);  
[pushouzhi@tsinghua.org.cn](mailto:pushouzhi@tsinghua.org.cn) (S. Pu), Tel. & Fax: +86-791-83831996.

#### **Contents**

**Fig. S1.** <sup>1</sup>H NMR (in DMSO-*d*<sub>6</sub>) spectrum of **10**

**Fig. S2.** <sup>13</sup>C NMR (in DMSO-*d*<sub>6</sub>) spectrum of **10**

**Fig. S3.** ESI–MS spectrum of **10**.

**Fig. S4.** Changes in fluorescence (fluorescence intensity at 585 nm) of **10** to various metal ions (10.0 equiv.) in aqueous acetonitrile (C = 2.0 × 10<sup>-5</sup> mol L<sup>-1</sup>, v/v = 1:1).

**Fig. S5.** Upon addition of different equivalents TFA and the emission intensity curve at 584 nm

**Fig. S6.** The absorption intensity changes of **10** at 531 nm with different equivalents of TFA

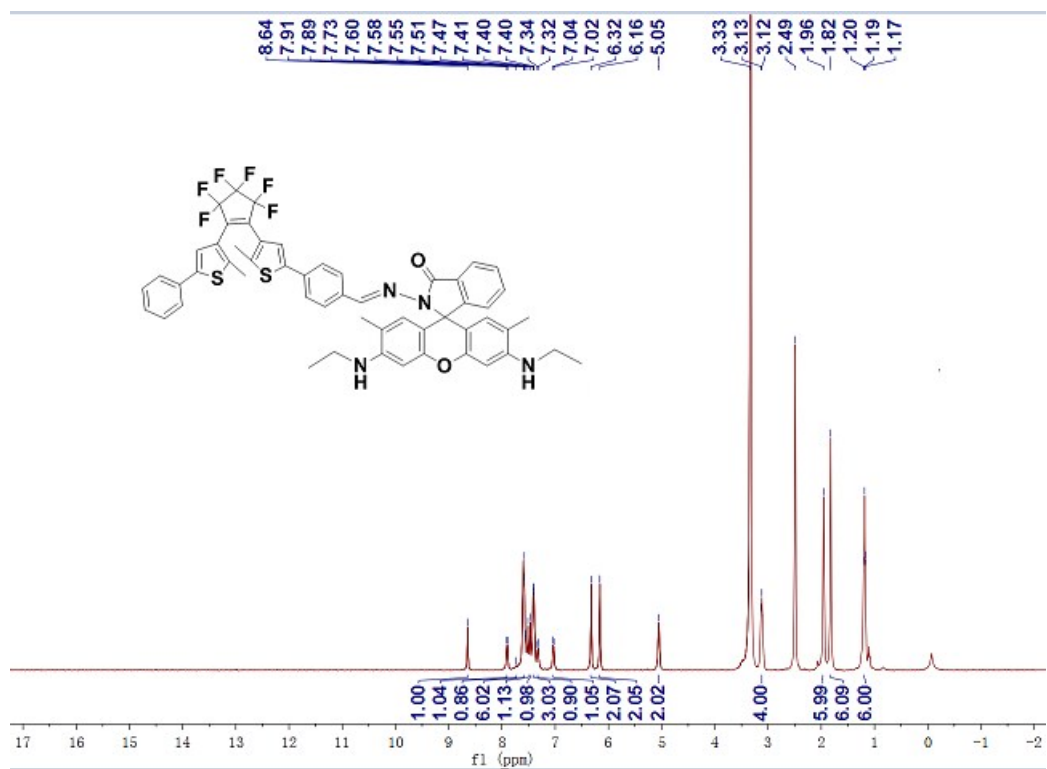

**Fig. S1.**  $^1\text{H}$  NMR (in  $\text{DMSO}-d_6$ ) spectrum of **10**

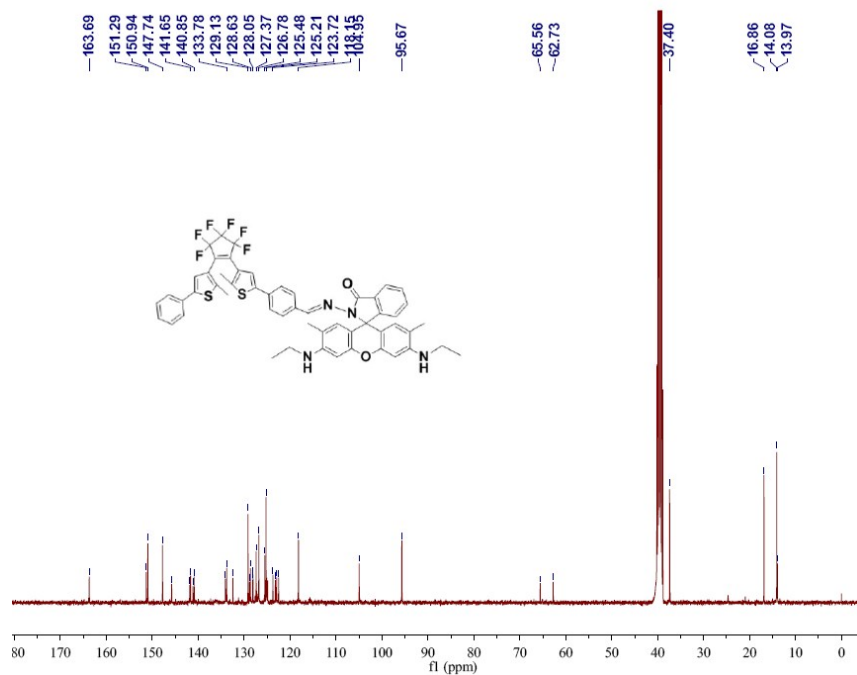

**Fig. S2.**  $^{13}\text{C}$  NMR (in  $\text{DMSO}-d_6$ ) spectrum of **10**

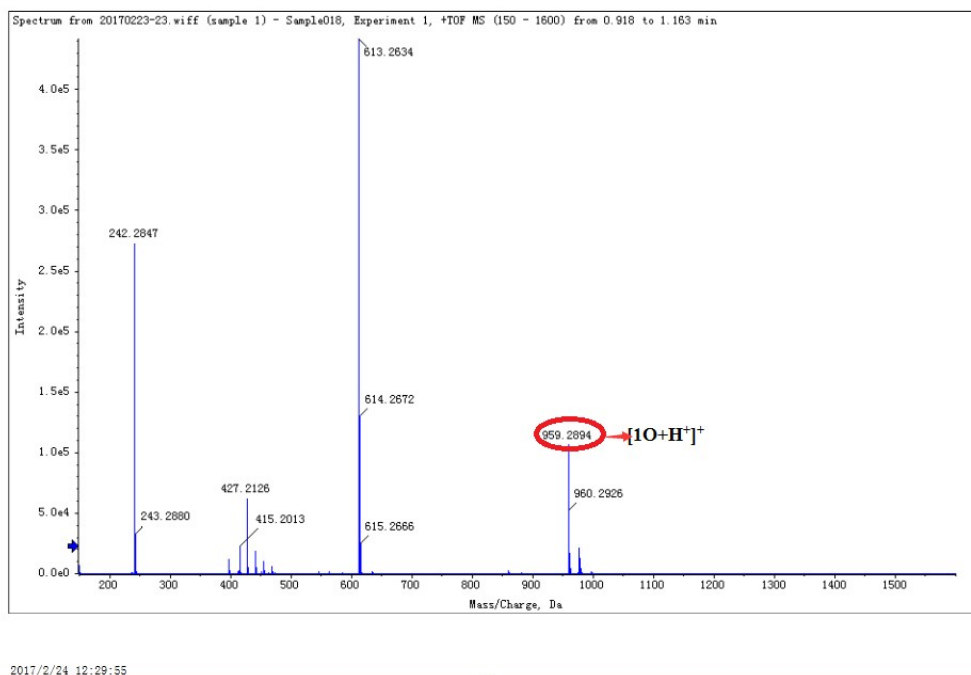

**Fig. S3.** ESI-MS spectrum of **10**.

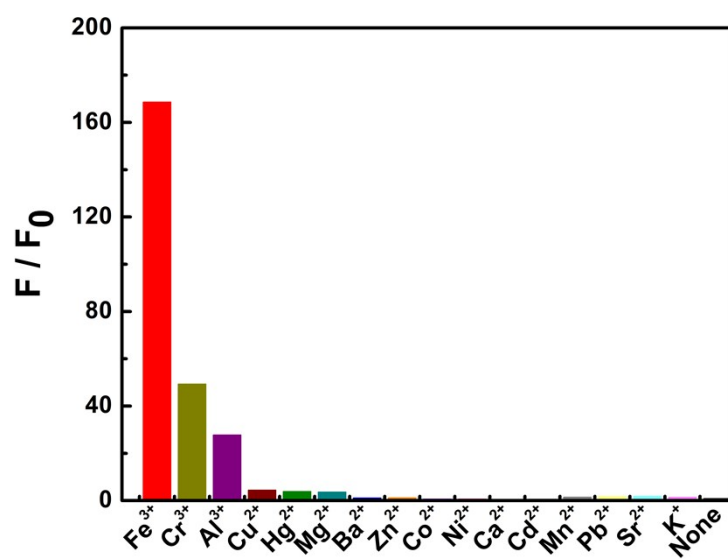

**Fig. S4.** Changes in fluorescence (fluorescence intensity at 585 nm) of **10** to various metal ions (10.0 equiv.) in aqueous acetonitrile ( $C = 2.0 \times 10^{-5} \text{ mol L}^{-1}$ , v/v = 1:1)

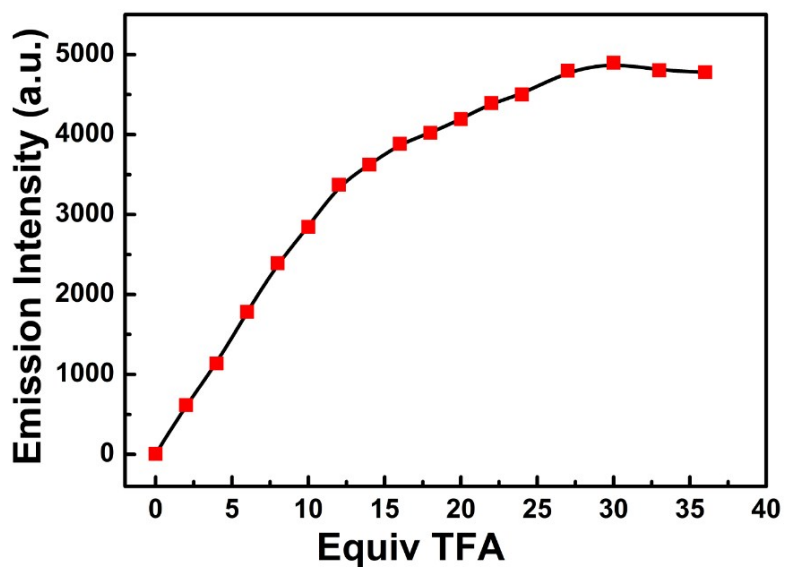

**Fig. S5.** Upon addition of different equivalents TFA and the emission intensity curve at 584 nm

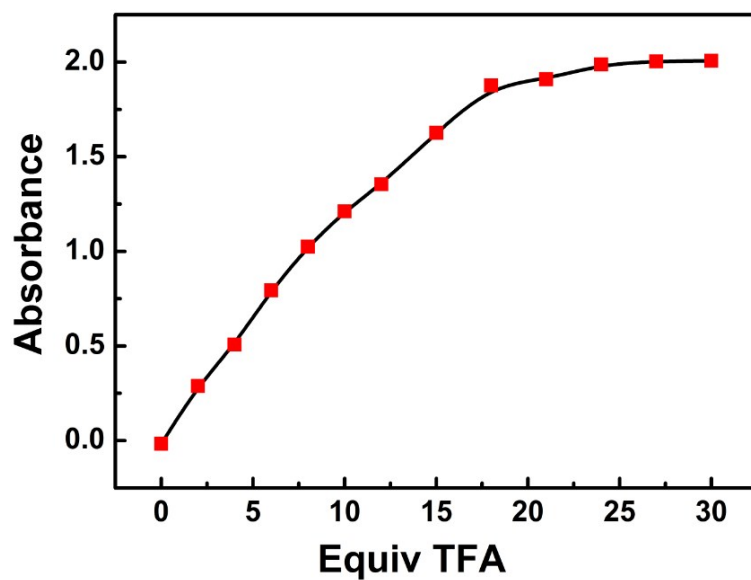

**Fig. S6.** The absorption intensity changes of **10** at 531 nm with different equivalents of TFA
